# Supplementary material
Source: PubMed Central journal article supplement (PMC3674332)
Supplement: NIHMS461845-supplement-01.pdf [file NIHMS461845-supplement-01.pdf]

## Supplemental Information inventory

Figure S1. ClpX hexamer structures; W-W-W<sup>TT</sup> activity (related to Figure 1 and Table S1).

Figure S2. ADP binding and gel filtration; activity of covalent hexamers with one mutant subunit (related to Figure 2).

Figure S3. Metal dependence of ClpX and ClpP activity; ATP hydrolysis and nucleotide binding of nCoMET variants (related to Figure 3).

Figure S4. Activity and nucleotide dependence of cCoMET variants (related to Figure 4).

Figure S5. L-lock variants bind ClpP (related to Figure 5).

Figure S6. Specificity of nCoMET quenching; cCoMET controls (related to Experimental Procedures).

Table S1. Crystallographic statistics (related to Figure 1).

Table S2. Nucleotide-interaction parameters obtained from activity assays (related to Figure 2).

Table S3. Nucleotide-interaction parameters obtained from nCoMET assays of binding (related to Figure 3)

Extended experimental procedures

Supplemental references

## Supplemental Figures and Tables.

**Figure S1.** ClpX hexamer structures; W-W-W<sup>TT</sup> activity (related to Figure 1 and Table S1).

(A) Top and side views of structures (protein in cartoon representation; nucleotide in CPK representation) of a 4L:2U hexamer (left), the modeled 5L:1U hexamer (middle), and the 6L hexamer (right). The 4L:2U and 5L:1U structures are asymmetric, whereas the 6L structure is essentially 6-fold symmetric. (B) Tethered ClpX W-W-W<sup>TT</sup> trimers (0.3  $\mu$ M pseudo hexamer) containing the TT modifications (D76C<sup>TAMRA</sup>; K330C<sup>TAMRA</sup>) had activities similar to the parental W-W-W enzyme (0.3  $\mu$ M pseudo hexamer) in hydrolyzing 4 mM ATP (left panel) and in supporting degradation of 10  $\mu$ M cp7-GFP-ssrA by 0.5  $\mu$ M ClpP (right panel). Data are shown as mean  $\pm$  SD.

**Figure S2.** ADP binding and gel filtration; activity of covalent hexamers with one mutant subunit (related to Figure 2).

(A) Binding of ADP to W-VI-W assayed by isothermal titration calorimetry. (B) Binding of ADP to W<sub>6</sub> ClpX assayed by isothermal titration calorimetry. In panels A and B, the initial concentrations in pseudo hexamer equivalents of the ClpX variants were 15.8 μM (W-VI-W) and 54.0 μM (W<sub>6</sub>). Binding isotherms were fit to a one-site model using MicroCal Origin software. Data also fit well two a two-site model (W-VI-W; site 1:  $K_D = 3 \pm 1 \mu\text{M}$ ,  $N = 2.0 \pm 0.6$ ; site 2:  $K_D = 26 \pm 10 \mu\text{M}$ ,  $N = 1.3 \pm 0.8$ ; W6; site 1:  $K_D = 5 \pm 2 \mu\text{M}$ ,  $N = 2.0 \pm 1.1$ ; site 2:  $K_D = 46 \pm 20 \mu\text{M}$ ,  $N = 2.0 \pm 0.8$ ). (C) W-VI-W and W-W-W chromatographed at positions expected for pseudo hexamers on a Superose 6 gel-filtration column (loading concentration 15 μM). (D) ATP dependence of the rate of cp7-CFP-ssrA (20 μM) degradation by covalent ClpX hexamers (0.2 μM pseudo hexamer; 0.5 μM ClpP<sub>14</sub>) containing all wild-type subunits or a single nucleotide-binding-deficient VI, VIE, or VIK subunit. The VIK subunit contains V78A/I79A and K125M, which alters the conserved lysine of the Walker-A motif and also prevents hydrolysis in the subunit bearing this substitution. The data for W-W-W-W-W-W and W-W-W-W-W-VIE are reproduced from Fig. 2F. The lines are fits to the Hill equation. Fitted parameters are listed in Table S2. Data are shown as mean ± SD.

**Figure S3.** Metal dependence of ClpX and ClpP activity; ATP hydrolysis and nucleotide binding of nCoMET variants (related to Figure 3).

(A) Mg<sup>2+</sup> and Co<sup>2+</sup> supported activity of W-W-W ClpX (1 μM pseudo hexamer) in unfolding 10 μM cp7-CFP-ssrA. (B) Mg<sup>2+</sup> and Co<sup>2+</sup> supported activity of W-W-W (0.3 μM pseudo hexamer) in hydrolysis of ATP in the presence of 10 μM cp7-CFP-ssrA. (C) Mg<sup>2+</sup> and Co<sup>2+</sup> supported activity of W-W-W (1 μM pseudo hexamer) in hydrolysis of ATPγS. In panels A-C, assays were performed in PD buffer supplemented with the appropriate divalent metal (10 mM) at room temperature. (D) Co<sup>2+</sup> inhibits ClpP cleavage. The rate of cleavage of a succinyl-Leu-Tyr-AMC dipeptide (50 μM) by ClpP<sub>14</sub> (1 μM) was assayed by changes in fluorescence (excitation 345 nm; emission 440 nm) in PD buffer supplemented with 10 mM MgCl<sub>2</sub> or 10 mM CoCl<sub>2</sub>. Rates were normalized to the rate with 10 mM MgCl<sub>2</sub>. (E) Rates of hydrolysis of ATP (5 mM) by W-W-W and the Oregon-Green labeled W-W-W\* variant (0.3 μM pseudo hexamer) in the presence of cp7-CFP-ssrA (10 μM). (F) ADP binding to pseudo hexamers (0.1 μM) of W\*-VI-W, W-VI\*-W, and W-VI-W\* assayed by nCoMET. The lines are fits to a hyperbolic equation.  $K_{app}$  values are listed in Table S3. (G) Nucleotide binding to W-W-W\* (0.1 μM pseudo hexamer for ATPγS and ADP titrations; 0.5 μM pseudo hexamer plus 10 μM cp7-CFP-ssrA for ATP titration) assayed by nCoMET. Lines are fits to a hyperbolic function.  $K_{app}$  values are listed in Table S3. Data are represented as mean ± SD.

**Figure S4.** Activity and nucleotide dependence of cCoMET variants (related to Figure 4).

(A) Tethered ClpX trimers (0.3 μM pseudo hexamer) containing the cCoMET (§) modifications (K330C<sup>TAMRA</sup>; H68Q/N72H/D76H) were active in hydrolyzing 4 mM ATP in the presence or absence of Ni<sup>2+</sup>-NTA (500 μM). (B) Modified variants were also active in supporting degradation of 10 μM cp7-GFP-ssrA by 0.5 μM ClpP. Same conditions as panel A. (C) ADP-dependent changes in the conformations of subunits containing cCoMET probes were assayed

for pseudo hexamers (0.3  $\mu\text{M}$ ) of  $\text{W}^{\text{S}}\text{-VI-W}$ ,  $\text{W-VI}^{\text{S}}\text{-W}$ , and  $\text{W-VI-W}^{\text{S}}$ . Lines are fits to a Hill equation. The values of  $K_{\text{app}}$  and  $n$  were  $11 \pm 1 \mu\text{M}$  and  $1.1 \pm 0.1$  for  $\text{W}^{\text{S}}\text{-VI-W}$ ,  $270 \pm 8 \mu\text{M}$  and  $2.2 \pm 0.1$  for  $\text{W-VI}^{\text{S}}\text{-W}$ , and  $6 \pm 2 \mu\text{M}$  and  $1.1 \pm 0.2$  for  $\text{W-VI-W}^{\text{S}}$ . **(D)** Nucleotide-dependent changes in the rightmost subunit of  $\text{W-W-W}^{\text{S}}$  (0.3  $\mu\text{M}$  pseudo hexamer for ATP $\gamma$ S and ADP titrations; 0.3  $\mu\text{M}$  pseudo hexamer plus 10  $\mu\text{M}$  cp7-CFP-ssrA for ATP titration) assayed by cCoMET. Lines are fits to a Hill equation.  $K_{\text{app}}$  and  $n$  values were  $66 \pm 5 \mu\text{M}$  and  $1.4 \pm 0.1$  for ADP,  $150 \pm 5 \mu\text{M}$  and  $1.6 \pm 0.1$  for ATP, and  $27 \pm 1 \mu\text{M}$  and  $1.6 \pm 0.1$  for ATP $\gamma$ S. Data are represented as mean  $\pm$  SD.

**Figure S5.** L-lock variants bind ClpP (related to Figure 5).

Rates of cleavage of a fluorescent decapeptide (15  $\mu\text{M}$ ) by a cysteine-free ClpP<sub>14</sub> variant (50 nM) were determined in the presence of different ClpX variants (0.2  $\mu\text{M}$  pseudo hexamer) and 1 mM ATP $\gamma$ S. The disulfide-bonded L-lock enzymes bind ClpP and enhance peptide cleavage, although they do not support degradation of protein substrates. Data are represented as mean  $\pm$  SD.

**Figure S6.** Specificity of nCoMET quenching; cCoMET controls (related to Experimental Procedures).

**(A)** Specificity of nCoMET quenching. In PD buffer plus 10 mM CoCl<sub>2</sub>, ATP reduced the fluorescence of  $\text{W-W-W}^*$ , but GTP or buffer with no nucleotide did not result in quenching. Data are shown as mean  $\pm$  SD. **(B)** In the absence of Ni<sup>2+</sup>-NTA, titration of ATP against  $\text{W-W-W}^{\text{S}}$  (0.3  $\mu\text{M}$ ) did not result in quenching. **(C)** Titration of Ni<sup>2+</sup>-NTA against  $\text{W-W-W}^{\text{S}}$  (0.1  $\mu\text{M}$ ) gave ~30% quenching. The line is a single hyperbolic fit with  $K_{\text{app}} = 25 \pm 2 \mu\text{M}$ . **(D)** ATP dependence of cCoMET quenching for a  $\text{W-W-W}$  variant containing TAMRA-labeled S389C in the small AAA+ domain of the second subunit and the His<sup>72</sup>-X<sub>3</sub>-His<sup>76</sup> mutations in the large domain of the third subunit. This cCoMET pair spans a single rigid-body unit. The line is a single hyperbolic fit with  $K_{\text{app}} = 30 \pm 9 \mu\text{M}$ . At nucleotide concentrations at which the low-affinity sites are occupied and ATP hydrolysis occurs, no major changes were observed indicating that the conformational changes monitored with other cCoMET pairs, which correlate with ATP hydrolysis, involve changes across the hinged interfaces of ClpX rather than the rigid-body interfaces.

**Table S1.** Crystallographic statistics (related to Figure 1).

|                                                  |                                               |                                               |                                               |                                               |                                               |                 |
|--------------------------------------------------|-----------------------------------------------|-----------------------------------------------|-----------------------------------------------|-----------------------------------------------|-----------------------------------------------|-----------------|
| ClpX variant                                     | E-E-ER                                        | W-W-W                                         | W-W-W                                         | W-W-R                                         | E-R                                           | W-W-W           |
| PDB code                                         | 4I81                                          | 4I4L                                          | 4I34                                          | 4I5O                                          | 4I63                                          | 4I9K            |
| tether length                                    | 20                                            | 20                                            | 20                                            | 20                                            | 20                                            | 0               |
| bound nucleotide                                 | ATP $\gamma$ S                                | ADP                                           | none                                          | none                                          | none                                          | none            |
| crystallization well solution                    | <i>a</i>                                      | <i>a</i>                                      | <i>a</i>                                      | <i>b</i>                                      | <i>b</i>                                      | <i>c</i>        |
| <b>Data collection</b>                           |                                               |                                               |                                               |                                               |                                               |                 |
| space group                                      | P2 <sub>1</sub> 2 <sub>1</sub> 2 <sub>1</sub> | P6 <sub>3</sub> |
| unit-cell lengths (a, b, c) (Å)                  | 57.9                                          | 55.9                                          | 58.3                                          | 55.2                                          | 55.2                                          | 119.4           |
|                                                  | 199.2                                         | 181.9                                         | 199.6                                         | 199.9                                         | 201.2                                         | 119.4           |
|                                                  | 211.9                                         | 201.4                                         | 203.4                                         | 222.3                                         | 222.6                                         | 111.7           |
| unit-cell angles ( $\alpha, \beta, \gamma$ ) (°) | 90, 90, 90                                    | 90, 90, 90                                    | 90, 90, 90                                    | 90, 90, 90                                    | 90, 90, 90                                    | 90, 90, 120     |
| resolution (Å)                                   | 50.0 – 3.8                                    | 50 – 3.7                                      | 50.0 – 4.1                                    | 50.0 – 4.5                                    | 50.0 – 5.7                                    | 60.0 – 4.5      |
| $R_{\text{sym}}$ (%)                             | 7.4 (84.3)                                    | 7.7 (30.9)                                    | 5.9 (29.4)                                    | 7.7 (27.8)                                    | 9.6 (35.2)                                    | 18.6 (27.2)     |
| (I)/sig(I)                                       | 24.7 (1.6)                                    | 16.9 (3.1)                                    | 24.8 (3.8)                                    | 17.1 (4.3)                                    | 20.7 (2.9)                                    | 5.5 (4.1)       |
| redundancy                                       | 6.7 (6.5)                                     | 3.8 (3.4)                                     | 5.7 (4.3)                                     | 4.0 (3.2)                                     | 8.5 (5.0)                                     | 6.4 (6.6)       |
| completeness (%)                                 | 98.8 (95.5)                                   | 93.9 (95.3)                                   | 97.2 (84.1)                                   | 92.2 (80.4)                                   | 99.4 (96.2)                                   | 94.6 (95.7)     |
| <b>Refinement</b>                                |                                               |                                               |                                               |                                               |                                               |                 |
| resolution (Å)                                   | 41.0 – 3.9                                    | 45.4 – 3.7                                    | 38.5 – 4.1                                    | 48.3 – 4.5                                    | 49.1 – 5.7                                    | 49.1 – 5.0      |
| $R_{\text{work}}/R_{\text{free}}$ (%)            | 26.2/29.6                                     | 27.5/33.4                                     | 27.4/30.8                                     | 28.6/32.3                                     | 30.7/31.5                                     | 32.2/35.2       |
| rmsd bond angles (°)                             | 0.452                                         | 0.508                                         | 0.499                                         | 0.452                                         | 0.449                                         | 0.613           |
| rmsd bond lengths (Å)                            | 0.002                                         | 0.003                                         | 0.003                                         | 0.002                                         | 0.002                                         | 0.004           |
| allowed Ramachandran (%)                         | 100                                           | 100                                           | 100                                           | 100                                           | 100                                           | 100             |

Well solution *a* is 1.9 M ammonium sulfate, 75 mM sodium acetate (pH 4.8). Well solution *b* is 2.2 M ammonium sulfate, 0.2 M ammonium bromide, 0.1 M bicine (pH 9.0). Well solution *c* is 2 M ammonium sulfate, 0.15 M potassium sulfate, 4 mM ATP, 4 mM MgCl<sub>2</sub> chloride, and 50 mM EDTA.

**Table S2.** Nucleotide-interaction parameters obtained from activity assays (related to Figure 2).

| variant       | nucleotide     | assay       | $K_M$ or $K_{1/2}$ ( $\mu\text{M}$ ) | Hill constant  | $R^2$ |
|---------------|----------------|-------------|--------------------------------------|----------------|-------|
| W-W-W         | ATP            | hydrolysis  | $230 \pm 3$                          | $1.3 \pm 0.1$  | 0.999 |
|               |                | unfolding   | $410 \pm 23$                         | $1.4 \pm 0.1$  | 0.998 |
|               | ATP $\gamma$ S | hydrolysis  | $9 \pm 1$                            | $1.3 \pm 0.2$  | 0.998 |
| W-VI-W        | ATP            | hydrolysis  | $3900 \pm 350$                       | not determined | 0.998 |
|               |                | unfolding   | $3300 \pm 210$                       | $1.6 \pm 0.1$  | 0.999 |
|               | ATP $\gamma$ S | hydrolysis  | $470 \pm 37$                         | $0.9 \pm 0.1$  | 0.999 |
| W-VIE-W       | ATP            | hydrolysis  | $79 \pm 7$                           | $0.9 \pm 0.1$  | 0.996 |
| W-W-W-W-W-W   | ATP            | degradation | $22 \pm 2$                           | $1.4 \pm 0.2$  | 0.985 |
| W-W-W-W-W-VI  | ATP            | degradation | $40 \pm 3$                           | $1.5 \pm 0.2$  | 0.987 |
| W-W-W-W-W-VIE | ATP            | hydrolysis  | $67 \pm 11$                          | $1.3 \pm 0.2$  | 0.979 |
|               |                | degradation | $79 \pm 14$                          | $0.8 \pm 0.1$  | 0.987 |
| W-W-VIE-W-W-W | ATP            | hydrolysis  | $86 \pm 16$                          | $1.1 \pm 0.2$  | 0.976 |
|               |                | degradation | $98 \pm 10$                          | $1.3 \pm 0.1$  | 0.993 |
| W-W-W-W-W-VIK | ATP            | degradation | $400 \pm 100$                        | $1.2 \pm 0.2$  | 0.972 |

VI – V78A/I79A

VIE – V78A/I79A/E185Q

VIK – V78A/I79A/K125M

**Table S3.** Nucleotide-interaction parameters obtained from nCoMET assays of binding (related to Figure 3).

| variant | nucleotide     | $K_{app}$ ( $\mu\text{M}$ ) | $R^2$ |
|---------|----------------|-----------------------------|-------|
| W-W-W*  | ADP            | $25 \pm 4$                  | 0.990 |
|         | ATP            | $79 \pm 8$                  | 0.996 |
|         | ATP $\gamma$ S | $17 \pm 2$                  | 0.994 |
| W-VI-W* | ADP            | $1.8 \pm 0.1$               | 0.998 |
|         | ATP            | $14 \pm 1$                  | 0.996 |
|         | ATP $\gamma$ S | $13 \pm 1$                  | 0.998 |
| W*-VI-W | ADP            | $10 \pm 2$                  | 0.982 |
|         | ATP            | $68 \pm 14$                 | 0.984 |
|         | ATP $\gamma$ S | $59 \pm 8$                  | 0.992 |
| W-VI*-W | ADP            | not detected                |       |
|         | ATP            | not detected                |       |
|         | ATP $\gamma$ S | $430 \pm 200$               | 0.947 |

VI – V78A/I79A

## Extended Experimental Procedures

### Crystallization and structure determination

Crystallized proteins included a tethered E-R dimer and tethered W-W-W, W-W-R and E-E-ER trimers, where ER designates E185Q/R370K subunits (Table S1). These proteins did not contain the C169S mutation. Polypeptide tethers were twenty ( $T_{20}$ ) or zero ( $T_0$ ) residues and compatible with ClpX function (Glynn et al., 2012). Variants were crystallized at room temperature by hanging-drop vapor diffusion after mixing 1  $\mu$ L of well solution with 1  $\mu$ L of protein solution (~40  $\mu$ M pseudo hexamer). The composition of well solutions are listed in Table S1. The nucleotide-bound form of W-W-W with  $T_{20}$  tethers was obtained using a soaking procedure similar to one described previously (Glynn et al., 2009) but limited to 5 min. To obtain the structure of E-E-ER bound to ATP $\gamma$ S, nucleotide-free crystals were soaked in 3.4 M sodium malonate, 75 mM sodium acetate (pH 4.8), 4 mM ATP $\gamma$ S, and 4 mM MgCl<sub>2</sub> for approximately 2 h. All crystals were cryo-protected by coating in Paratone-N (Hampton Research) and flash-frozen in liquid nitrogen. Data were collected at the 24-ID-C beamline of the Advanced Photon Source, Argonne National Laboratories. Unit-cell volumes indicated that crystals with the space groups P2<sub>1</sub>2<sub>1</sub>2<sub>1</sub> and P6<sub>3</sub> contained six and two subunits in the asymmetric unit, respectively. Data collection and refinement statistics are listed in Table S1.

Diffraction data were integrated and scaled using HKL2000 (Otwinowski and Minor, 1997), TRUNCATE (Winn et al., 2011), MOSFLM (Leslie and Powell, 2007) and SCALA (Winn et al., 2011). The structures of the large and small AAA+ domains of *E. coli* ClpX (Glynn et al., 2009) were used as molecular-replacement search models in PHASER (McCoy et al., 2007). Each domain was placed independently to avoid bias towards previously observed conformations. Manual model building and real-space refinement were carried out in COOT (Emsley et al.,

2010). Rigid-body refinement, TLS refinement, and grouped atomic displacement parameter refinement were performed using PHENIX (Adams et al., 2010). Individual large and small AAA+ domains were defined as rigid bodies and TLS groups, with either individual domains or individual residues defined as atomic displacement parameter groups based on the resolution and quality of the data.

For crystals soaked in nucleotide, examination of calculated  $mF_o-DF_c$  maps revealed strong peaks of positive density in the nucleotide-binding pockets of loadable subunits. The single bound nucleotide in the ATP $\gamma$ S-soaked W-W-W ( $T_{20}$ ) structure could not be determined unambiguously, probably because of mixed occupancy by nucleotide and sulfate ions, and ADP provided the best fit for the electron density. For the E-E-ER crystal soaked in sodium malonate and ATP $\gamma$ S, the bound nucleotides were unambiguously modeled as ATP $\gamma$ S.

Structural validation was performed using MolProbity (Chen et al., 2010). Superposition of structures was carried out using LSKQAB (Winn et al., 2011). The atomic coordinates for all structures have been deposited in the Protein Data Bank, with accession codes listed in Table S1.

### **Supplemental References**

Adams, P.D., Afonine, P.V., Bunkoczi, G., Chen, V.B., Davis, I.W., Echols, N., Headd, J.J., Hung, L.W., Kapral, G.J., Grosse-Kunstleve, R.W., McCoy, A.J., Moriarty, N.W., Oeffner, R., Read, R.J., Richardson, D.C., Richardson, J.S., Terwilliger, T.C. and Zwart, P.H. (2010). PHENIX: a comprehensive Python-based system for macromolecular structure solution. *Acta Cryst.*, *D66*, 213-221.

Chen, V.B. Arendall, W.B. 3rd, Headd, J.J., Keedy, D.A., Immormino, R.M., Kapral, G.J., Murray, L.W., Richardson, J.S., & Richardson, D.C. (2010). MolProbity: all-atom structure validation for macromolecular crystallography. *Acta Cryst.*, *D66*, 12-21.

Emsley, P., Lohkamp, B., Scott, W.G. and Cowtan, K. (2010). Features and development of Coot. *Acta Cryst.*, *D66*, 486-501.

Leslie, A.G.W. and Powell, H.R. (2007). Processing Diffraction Data with Mosflm. *Evolving Methods for Macromolecular Crystallography*, *245*, 41-51.

McCoy, A.J., Grosse-Kunstleve, R.W., Adams, P.D., Winn, M.D., Storoni, L.C. and Read, R.J. (2007). Phaser crystallographic software. *J. Appl. Cryst.* *40*, 658-674.

Otwinowski, Z., and Minor, W. (1997). Processing of X-ray diffraction data collected in oscillation mode. *Methods Enzymol.* *276*, 307-326.

Winn, M.D., Ballard, C.C., Cowtan, K.D., Dodson, E.J., Emsley, P., Evans, P.R., Keegan, R.M., Krissinel, E.B., Leslie, A.G.W., McCoy, A., McNicholas, S.J., Murshudov, G.N., Pannu, N.S., Potterton, E.A., Powell, H.R., Read, R.J., Vagin, A. and Wilson, K.S. (2011). Overview of the *CCP4* suite and current developments. *Acta Cryst.* *D67*, 235-242.
