# Supplementary material
Source: PubMed Central journal article supplement (PMC3674332)

**A****4L:2U**  
pdb id: 4i81**5L:1U**  
model**6L**  
pdb id: 4i9k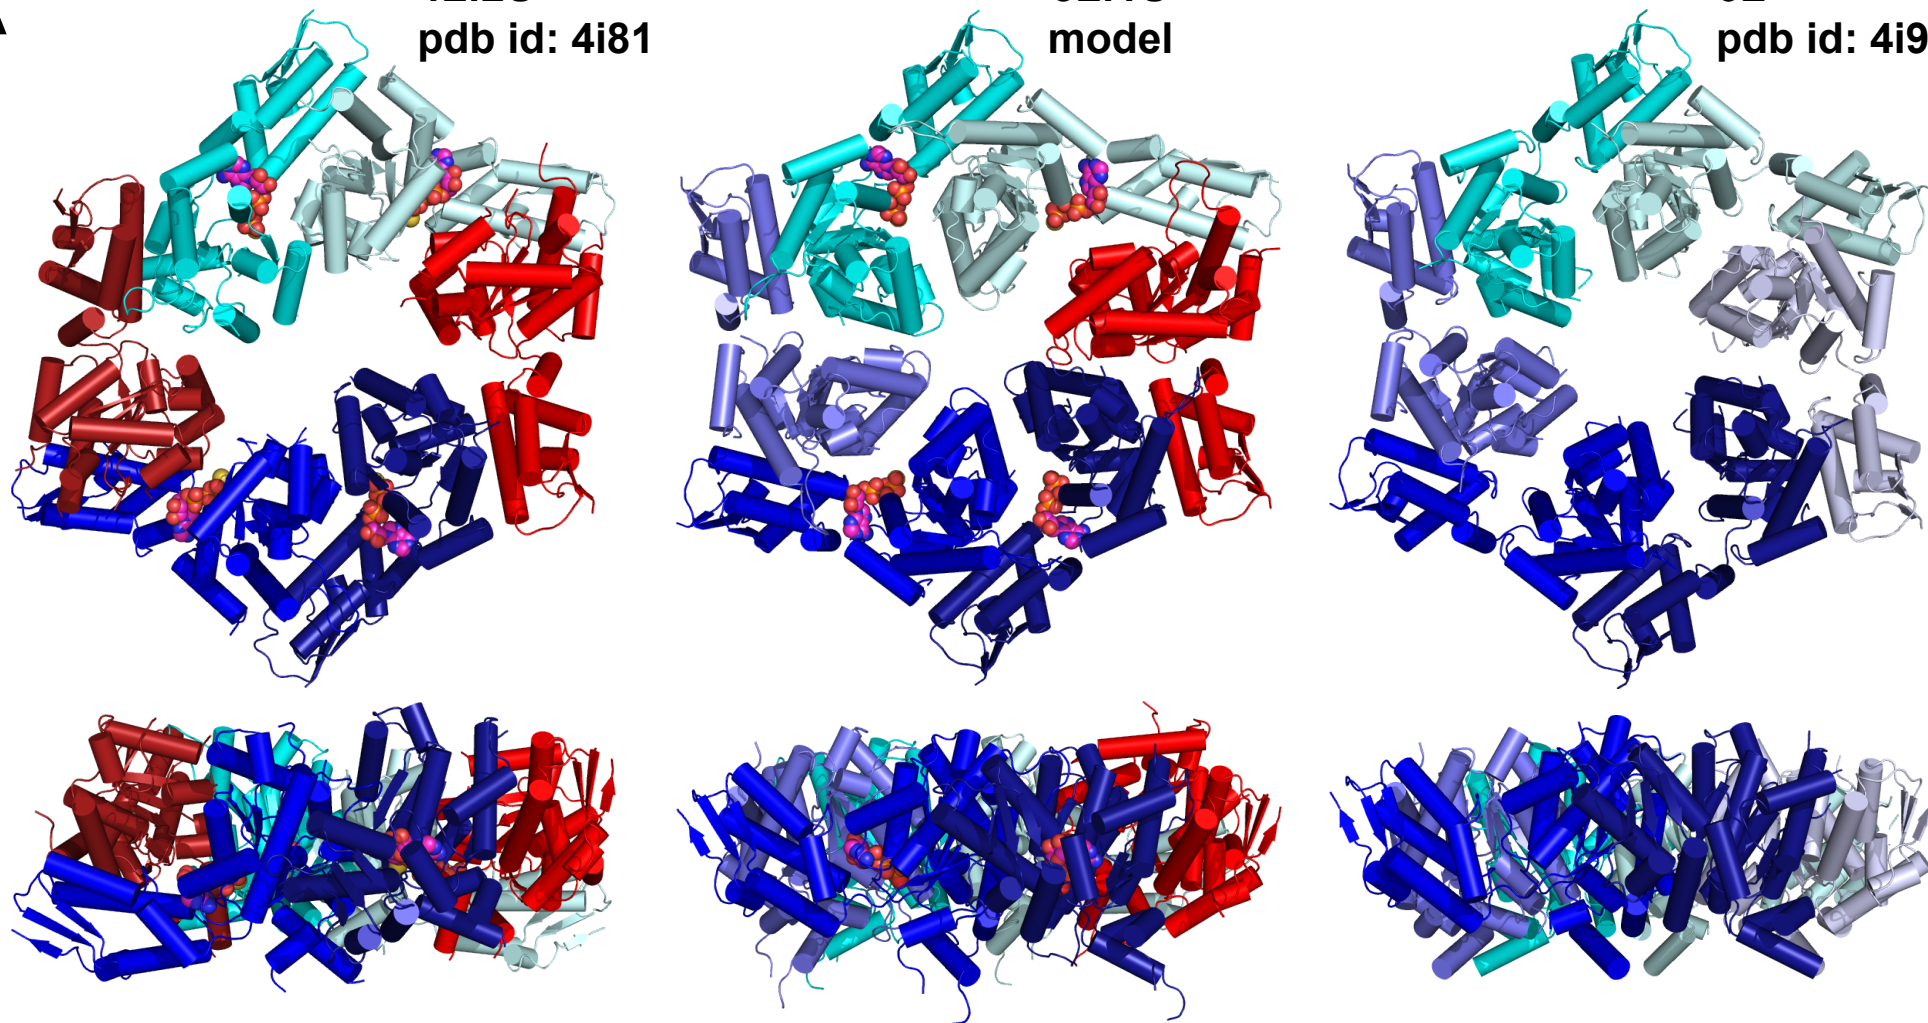**B**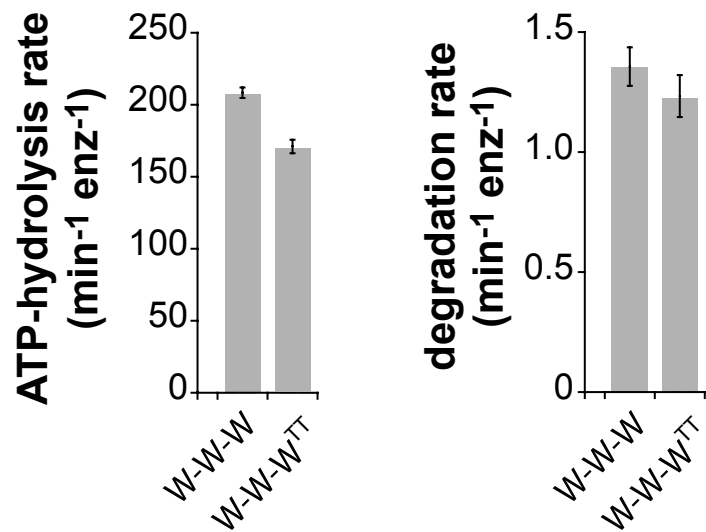

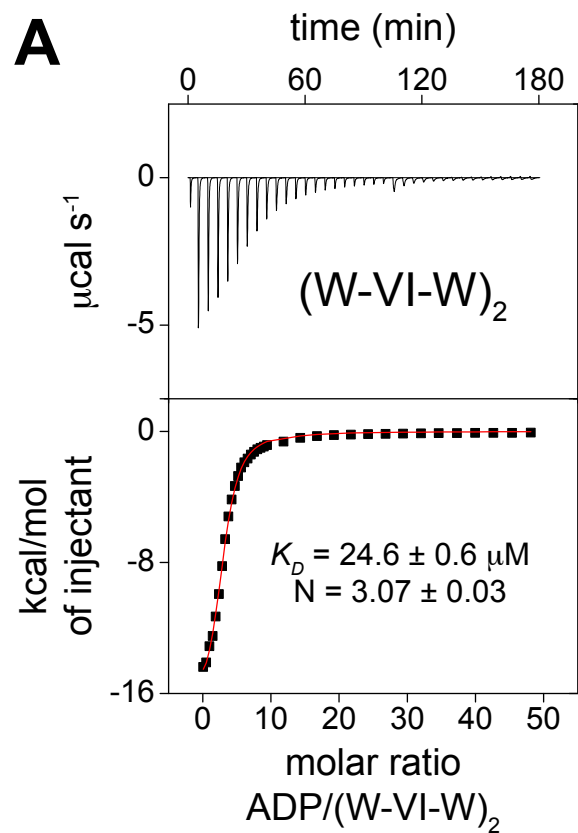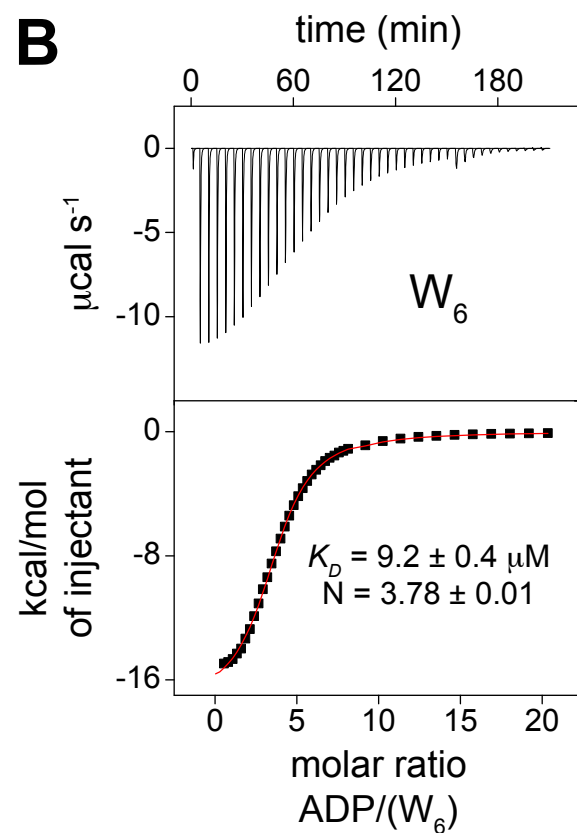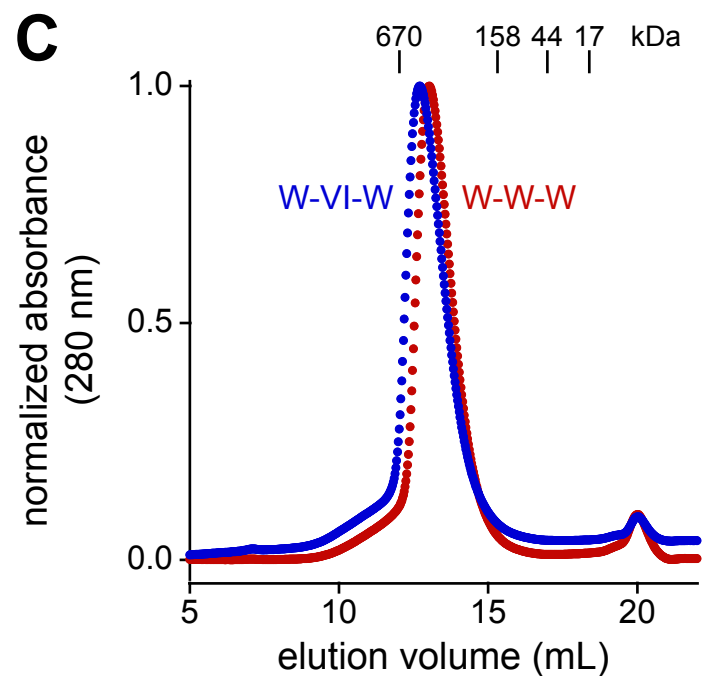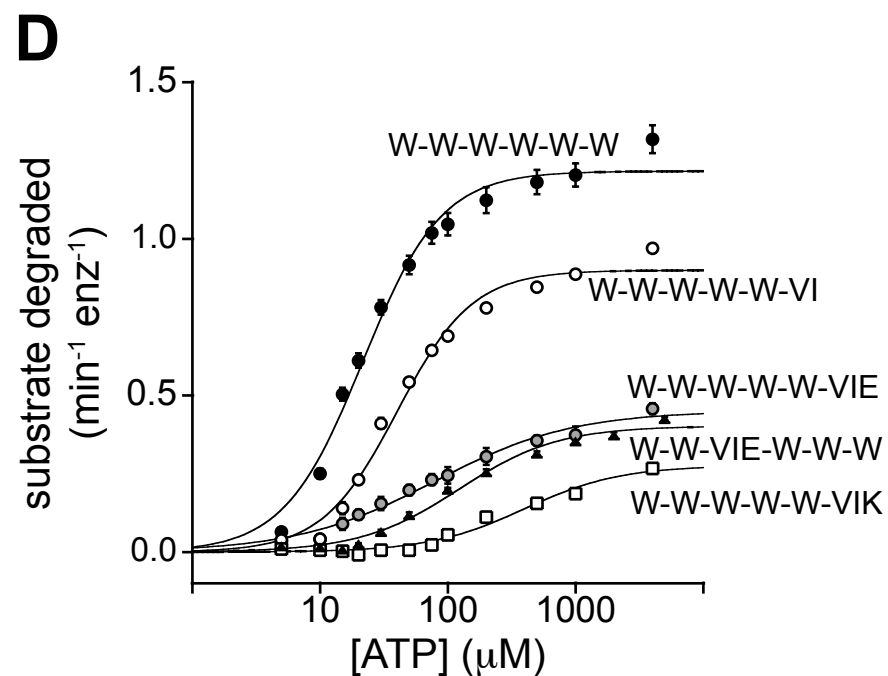

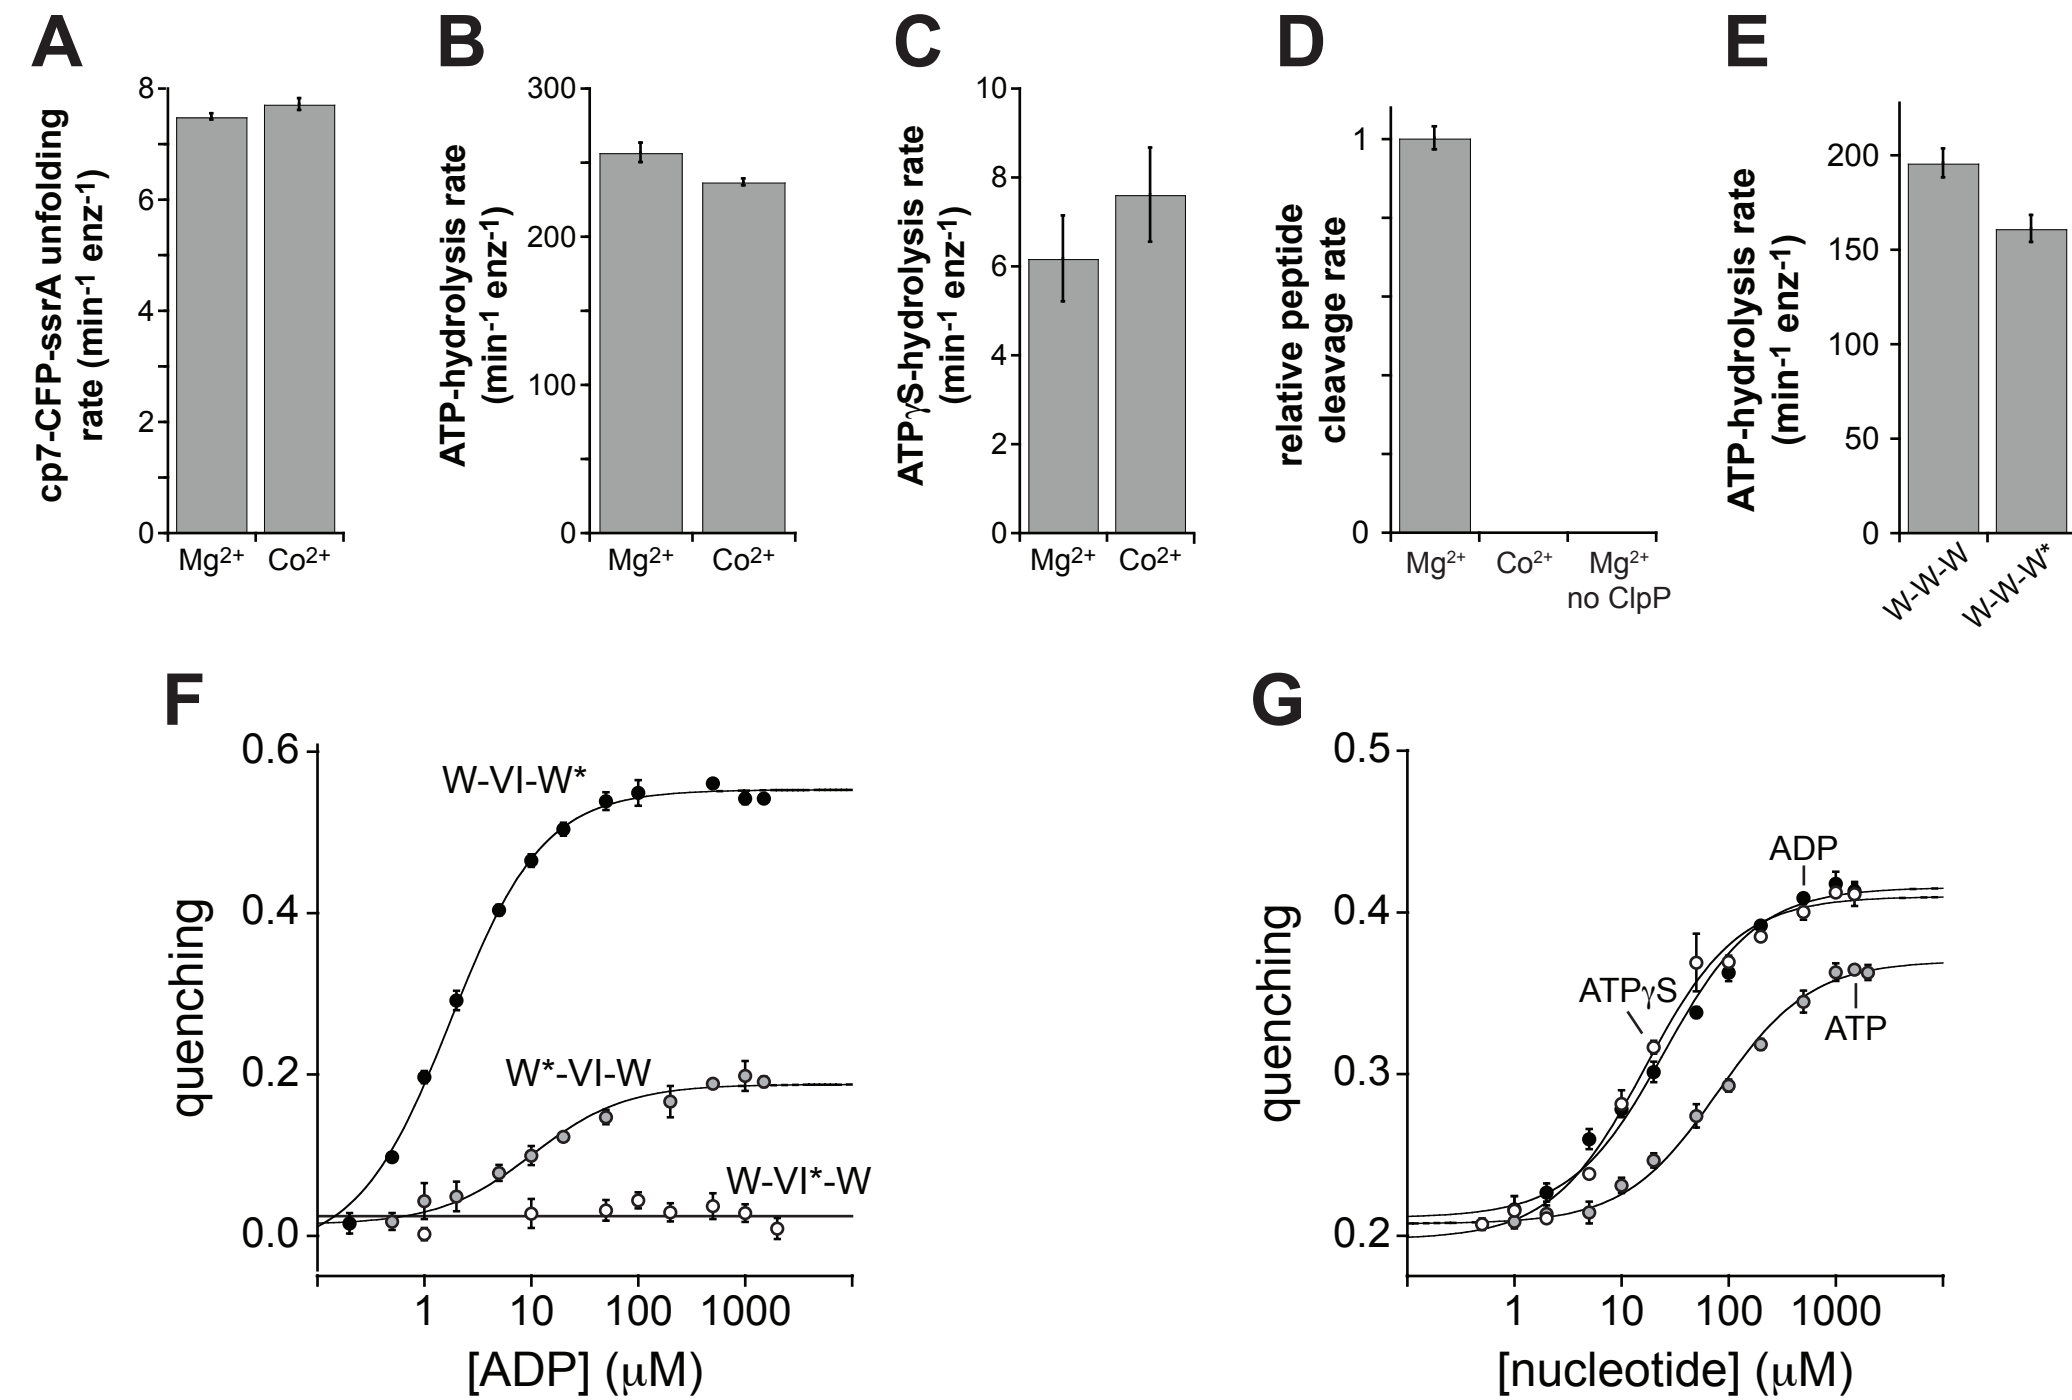

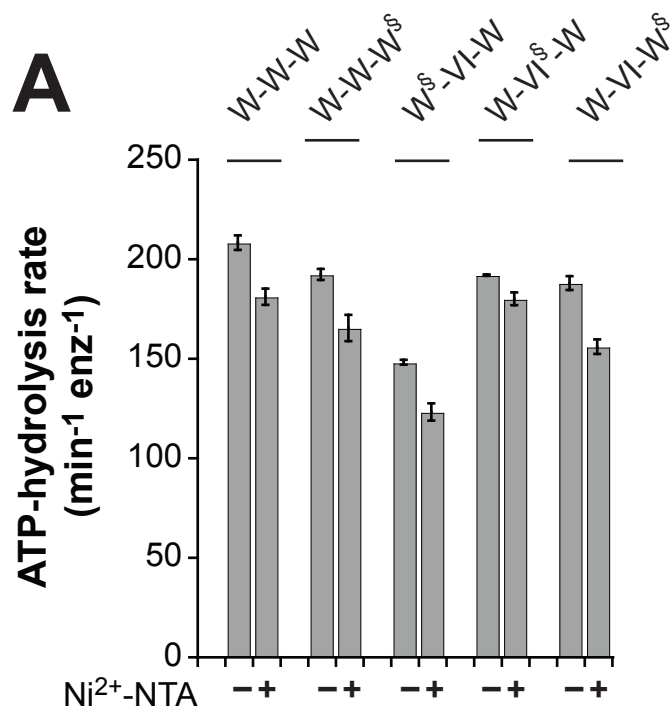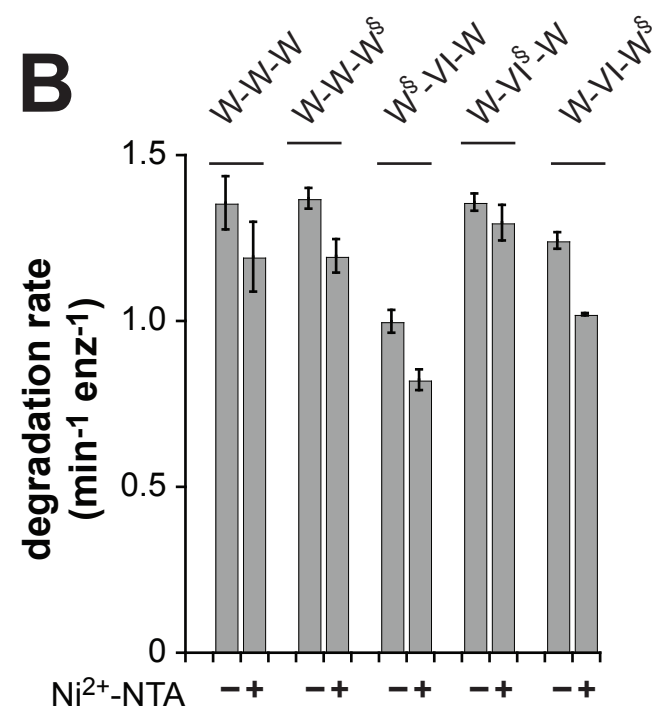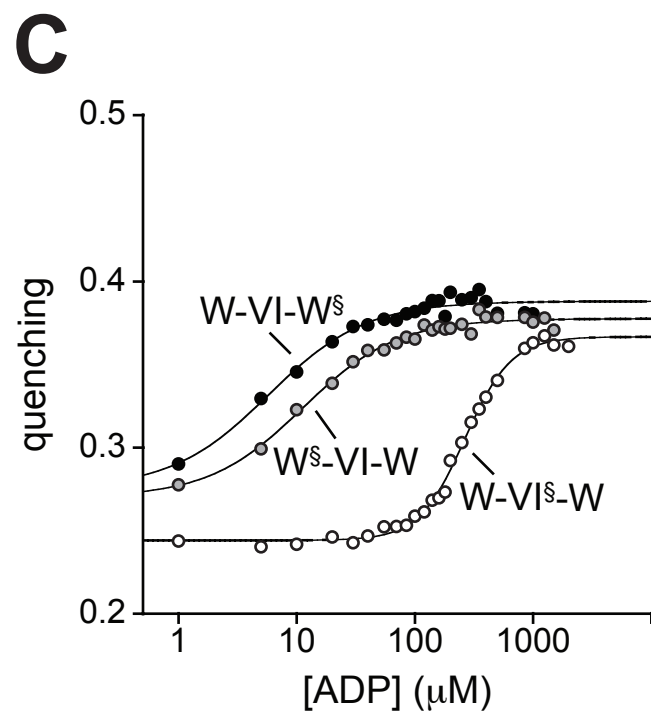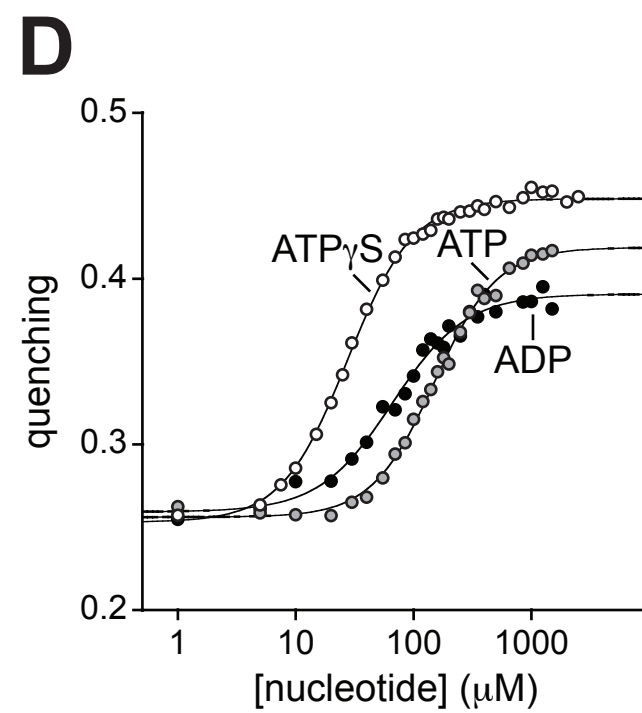

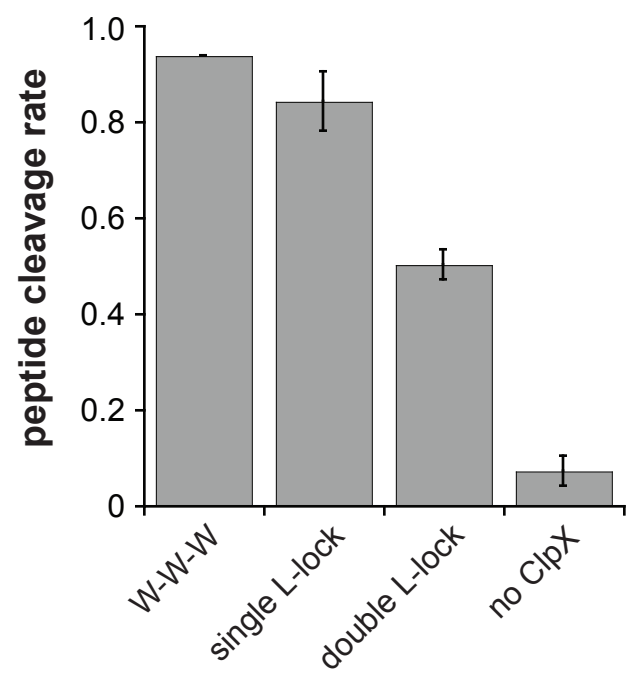

**A**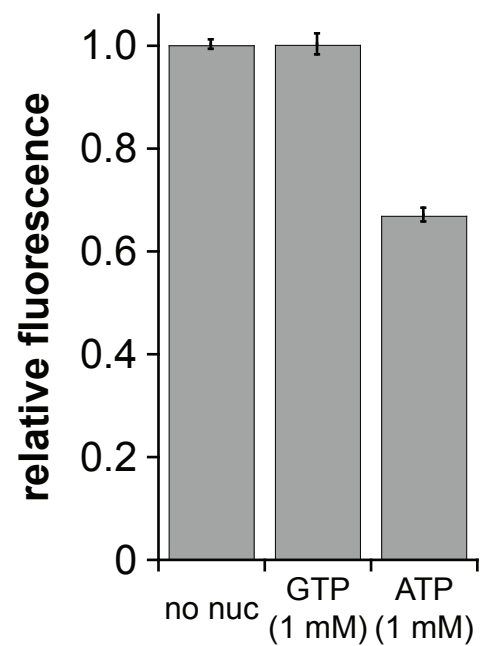**B**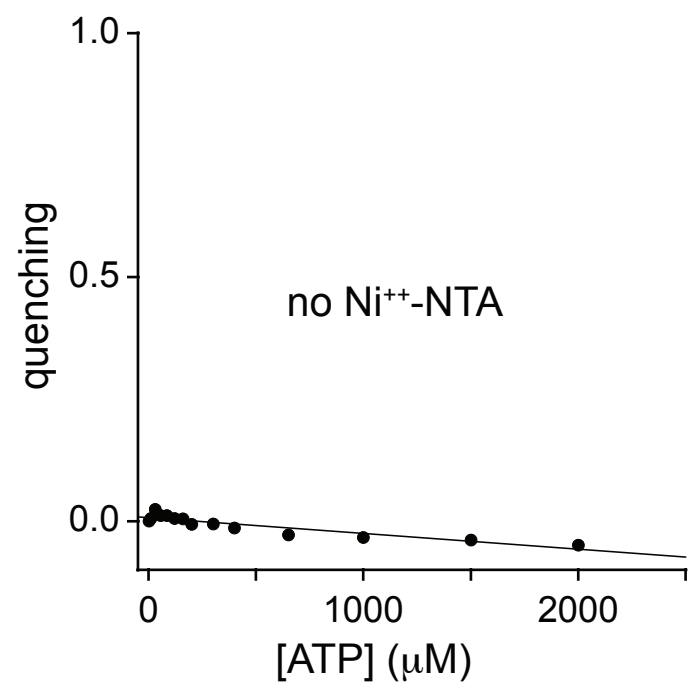**C**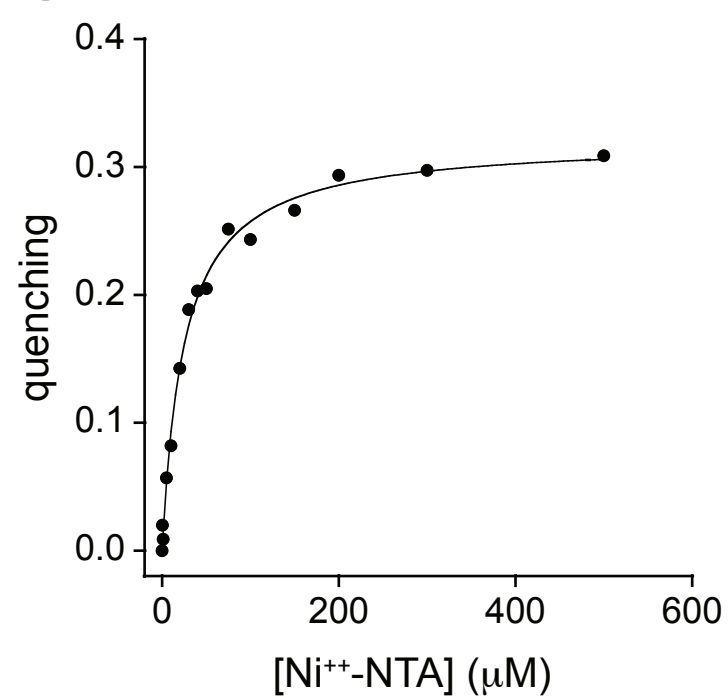**D**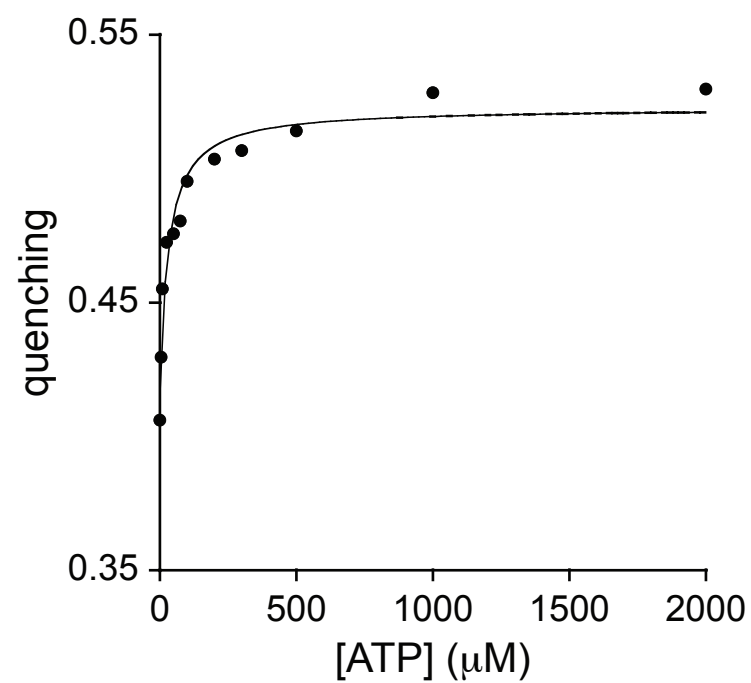

Supplement: NIHMS461845-supplement-02.pdf [file NIHMS461845-supplement-02.pdf]
